# Supplementary material for: Functional reconstitution of a bacterial CO2 concentrating mechanism in Escherichia coli
Source: eLife. 2020 Oct 21;9:e59882. doi: 10.7554/eLife.59882 (PMC7714395; doi:10.7554/eLife.59882)
Supplement: Supplementary file 1. — Table 1 describes the strains used in this study; Table 2 details all plasmids used; Table 3 gives primer sequences used in genotyping assays; Table 4 describes mutations observed during selection experiments; Table 5 gives a detailed description of all 20 genes expressed in this study with a detailed bibliography describing the evidence underpinning our current understanding of the molecular funciton of each gene. [file elife-59882-supp1.xlsx]

## Sheet: Table S1 - strains
Strain Name	Genotype	Antibiotic Resistance	Note	Reference	Link
BW25113		None	KEIO library parent strain	Baba et al., 2006; Datsenko and Wanner, 2000	https://cgsc2.biology.yale.edu/Strain.php?ID=64667
EDCM636	MG1655 Δ_x0008_lacZY can<>FLK2	Kanamycin	Acquired from the Yale Coli Genetic Stock Center	Merlin and Masters, 2003	https://cgsc2.biology.yale.edu/Strain.php?ID=82987
ΔrpiAB	BW25113 ΔrpiAB Δedd	None	Derived by P1 transduction from the KEIO library	This study
CAfree	BW25113 ΔcynT Δcan	None	Derived by P1 transduction of EDCM636 into the KEIO ΔcynT strain and subsequent curing of kanamycin resistance.	Desmarais et al., 2019; Du et al., 2014
CCMB1	BW25113 ΔrpiAB Δedd ΔcynT Δcan	None	Derived by P1 transduction from the KEIO library and EDCM636 into ΔrpiAB	This study

## Sheet: Table S2 - plasmids
Plasmid Name	Parent	Resistance Marker	Promoter	Induction	Expresses	Mutations	Additional Notes
pFE-sfGFP	pZE21	KanR	PLtet0-1	aTc	Superfolder GFP	NA	pZE21 expressing GFP under PLtet0-1 and constitutive tetR
pFA-sfGFP	pZA31	CmR	PLtet0-1	aTc	Superfolder GFP	NA	pZA31 expressing GFP under PLtet0-1 and constitutive tetR
pFA-DAB2	pFA-sfGFP	CmR	PLtet0-1	aTc	DabAB2 inorganic carbon transport complex	NA	Reported in Desmarais et al. Nat. Micro. 2019.
pFA-DAB1	pFA-sfGFP	CmR	PLtet0-1	aTc	DabAB1 inorganic carbon transport complex	NA	Expresses only the DAB1 genes (colored orange in Figure 1C).
p1A	pFE-sfGFP	KanR	PLtet0-1	aTc	H. neapolitanus CbbLS and S. elongatus Prk	NA	H. neapolitanus CbbLS and Prk from S. elongatus PCC 7942
p1A CbbL-	p1A	KanR	PLtet0-1	aTc	Inactive CbbLS and Prk	CbbL K194M
p1A Prk-	p1A	KanR	PLtet0-1	aTc	CbbLS and inactive Prk	Prk K20M S21A
pFE-Rrub-FII-prk	p1A	KanR	PLtet0-1	aTc	R. rubrum Form II rubisco and S. elongatus Prk	NA	Dimeric rubisco lacking a small subunit, relatively low CO2 specificity
pFE-Reu-FI-prk	p1A	KanR	PLtet0-1	aTc	R. eutropha Form IC rubisco and S. elongatus Prk	NA	Highest known CO2 specificity of any bacterial rubisco
pFE-Rs-FI-prk	p1A	KanR	PLtet0-1	aTc	R. spaeroides Form IC rubisco and S. elongatus Prk	NA
pFE-Selo-FI-prk	p1A	KanR	PLtet0-1	aTc	S. elongatus Form IB rubisco and S. elongatus Prk	NA	Same evolutionary lineage as rubiscos found in land plants and algae
pCB	pFE-sfGFP and pHnCB10	KanR	PLtet0-1	aTc	pHnCB10 derived carboxysome operon, prk	NA
pCB-gg	pCB	KanR	PLtet0-1	aTc	pHnCB10 derived carboxysome operon, prk	See Table S4 and Methods	pCB after selection for CCMB1 growth on gluconate at 10% CO2
pCB’	pCB-gg	KanR	PLtet0-1	aTc	pHnCB10 derived carboxysome operon, prk	See Table S4 and Methods	pCB reconstructed after selection for CCMB1 growth on glycerol under ambient air
pCB’ CsosCA-	pCB'	KanR	PLtet0-1	aTc	Carboxysome operon with inactive CsoSCA, prk	CsosCA C173S	Inactivation of CsoSCA by removal of a catalytic Zn-binding cysteine
pCB’ CsoS2 ΔNTD	pCB'	KanR	PLtet0-1	aTc	Carboxysome operon with truncated CsoS2, prk	Deletion of residues 2-256 of CsoS2	Deletion of rubisco-binding N-terminus of CsoS2
pCB’ Δcsos4AB	pCB'	KanR	PLtet0-1	aTc	Carboxysome operon lacking CsoS4AB, prk	csoS4AB deletion	Deletion of pentameric vertex proteins CsoS4AB
pCB’ CbbL Y72R	pCB'	KanR	PLtet0-1	aTc	Carboxysome operon with point mutation to CbbL, prk	CbbL Y72R	Substitution of CsoS2-binding tyrosine with arginine
pCCM	pFA-sfGFP	CmR	PLtet0-1	aTc	Second CCM operon cloned from H. neapolitanus	NA	pFA expressing the remaining 11 genes in the H. neapolitanus CCM cluster
pCCM’	pCCM	CmR	PLtet0-1	aTc	Second CCM operon	See table S4	pCCM reconstructed after selection for CCMB1 growth on glycerol under ambient air
pCCM’ ΔacRAF	pCCM'	CmR	PLtet0-1	aTc	Second CCM operon lacking acRAF	acRAF deletion	Deletion of putative rubisco chaperone, acRAF
pCCM’ CbbQ-	pCCM'	CmR	PLtet0-1	aTc	Second CCM operon with inactive CbbQ	CbbQ K46A, E107Q	Inactivation of CbbQ subunit of CbbOQ rubisco activase
pCCM’ DabA-	pCCM'	CmR	PLtet0-1	aTc	Second CCM operon with inactive DabA1	DabA1 C462A, D464A	Inactivation of DabA1 subunit of dabAB1 inorganic carbon transporter

## Sheet: Table S3 - genotyping primers
Primer ID	Description	Sequence
AF52	rpiA locus, forward primer	gtgcggatttgcatccgc
AF53	rpiA locus, reverse primer	ccgttgtatgctttatttgcggg
AF86	zwf locus locus, forward primer	aaagcctcgtgggtgaat
AF87	zwf locus locus, reverse primer	gcgcttttcccgtaatcg
AF137	cynT locus, forward primer	tcggcgagtagtctgcc
AF138	cynT locus, reverse primer	cttatttttaaaccatcaggagttccac

## Sheet: Table S4 - mutations due to sel
Plasmids	Nucleotide Change	Genetic Element	Consequence
pCB-gg and pCB'	5513T>G	tet repressor	tetR E37A
pCB-gg and pCB'	7758G>T	second tet operator	tetO2+8T
pCCM'	NA	Origin of replication	p15A origin replaced with high-copy colE1 origin

## Sheet: Table S5 - CCM cluster genes
Gene ID	Gene Name	Protein Localization	Description	References	Start Position	End Position	Strand	Length (NT)	Essentiality	HCR Phenotype
RefSeq NC_013422.1									Desmarais et al. 2019	Desmarais et al. 2019
HNEAP_RS04660	cbbL	carboxysome interior	Rubisco large subunit	2020-01-02	989858	991279	-	1421	nonessential	TRUE
HNEAP_RS04655	cbbS	carboxysome interior	Rubisco small subunit	2020-01-02	989489	989821	-	332	nonessential	TRUE
HNEAP_RS04650	csoS2	carboxysome interior	Disorded rubisco binding protein, required for carboxysome formation and rubisco localization	2020-03-06	986815	989436	-	2621	nonessential	TRUE
HNEAP_RS04645	csoSCA	carboxysome interior	Carboxysomal carbonic anhydrase	2020-07-09	985250	986794	-	1544	nonessential	TRUE
HNEAP_RS04640	csoS4A	carboxysome shell	Pentameric shell protein, proposed to localize to carboxysome vertices	2020-10-14	985002	985253	-	251	nonessential	TRUE
HNEAP_RS04635	csoS4B	carboxysome shell	Pentameric shell protein, proposed to localize to carboxysome vertices	2020-10-14	984757	985002	-	245	nonessential	TRUE
HNEAP_RS04630	csoS1C	carboxysome shell	Hexameric shell protein, localize to carboxysome faces	10-11,15	984409	984705	-	296	nonessential	TRUE
HNEAP_RS04625	csoS1A	carboxysome shell	Hexameric shell protein, localize to carboxysome faces	10-11,15	984038	984334	-	296	nonessential	TRUE
HNEAP_RS04620	csoS1B	carboxysome shell	Hexameric shell protein, localize to carboxysome faces	10-11,15	983594	983926	-	332	nonessential	TRUE
HNEAP_RS04615	acRAF	unknown	Proposed rubisco folding chaperone, homologous to plant rubisco assembly factor 2 (RAF2)	16-18	983002	983283	-	281	nonessential	TRUE
HNEAP_RS04610	parA / mcdA?	unknown	ParA family AAA+ ATPase, involved in carboxysome positioning and partitioning in alpha and beta carboxysome lineages.	19-20	982347	983027	-	680	nonessential	BORDERLINE
HNEAP_RS04605		unknown	Hypothetical protein		982060	982351	-	291	nonessential	FALSE
HNEAP_RS04600	cbbO	carboxysome shell?	VWA-domain containing component of the CbbOQ rubisco activase complex	21-23	979659	982025	-	2366	nonessential	FALSE
HNEAP_RS04595	dabB1	cell membrane	Membrane subunit of the DAB-type Ci transport complex	24-27	977820	979499	-	1679	nonessential	TRUE
HNEAP_RS04590		unknown	Likely membrane subunit of the DAB-type Ci transport complex	24-27	977072	977818	-	746	nonessential	BORDERLINE
HNEAP_RS04585	dabA1	cell membrane	Soluble subunit of the DAB-type Ci transport complex	24-27	973927	977067	-	3140	nonessential	TRUE
HNEAP_RS04580	CPII	unknown	P-II family nitrogen regulatory protein shown to bind bicarbonate (HCO3-)	28	973595	973930	-	335	nonessential	FALSE
HNEAP_RS04575	cbbQ	carboxysome shell?	AAA+ ATPase component of the CbbOQ rubisco activase complex	21-23	972739	973542	-	803	nonessential	BORDERLINE
HNEAP_RS04570		unknown	Conserved hypothetical protein		972405	972707	-	302	nonessential	FALSE
HNEAP_RS04565	csos1D	carboxysome shell	Hexameric shell protein with a larger pore, proposed to permit RuBP transit into the carboxysome.	29-31	971679	972320	-	641	nonessential	BORDERLINE
Reference Number	Note	Reference
1	Rubisco activity found in isolated carboxysomes.	J. M. Shively, F. Ball, D. H. Brown, R. E. Saunders, Functional organelles in prokaryotes: polyhedral inclusions (carboxysomes) of Thiobacillus neapolitanus. Science 182, 584–586 (1973).
2	Rubisco large and small subunits found in carboxysomes.	Y. A. Holthuijzen, J. F. L. van Breemen, J. Gijs Kuenen, W. N. Konings, Protein composition of the carboxysomes of Thiobacillus neapolitanus. Arch. Microbiol. 144, 398–404 (1986).
3	CsoS2 gene identified bioinformatically.	S. H. Baker, et al., The correlation of the gene csoS2 of the carboxysome operon with two polypeptides of the carboxysome in thiobacillus neapolitanus. Arch. Microbiol. 172, 233–239 (1999).
4	Csos2 is required for carboxysome formation.	F. Cai, et al., Advances in Understanding Carboxysome Assembly in Prochlorococcus and Synechococcus Implicate CsoS2 as a Critical Component. Life 5, 1141–1171 (2015).
5	CsoS2A/B polypeptides are formed by frameshifting.	T. Chaijarasphong, et al., Programmed Ribosomal Frameshifting Mediates Expression of the α-Carboxysome. J. Mol. Biol. 428, 153–164 (2016).
6	CsoS2 N-terminus binds the rubisco complex and recruits it to the carboxysome. This paper also reports a structure of the H. neapolitanus rubisco complex.	L. M. Oltrogge, et al., Multivalent interactions between CsoS2 and Rubisco mediate α-carboxysome formation. Nat. Struct. Mol. Biol. 27, 281–287 (2020).
7	CsoSCA (formerly CSos3) is localized to carboxysomes.	S. H. Baker, D. S. Williams, H. C. Aldrich, A. C. Gambrell, J. M. Shively, Identification and localization of the carboxysome peptide Csos3 and its corresponding gene in Thiobacillus neapolitanus. Arch. Microbiol. 173, 278–283 (2000).
8	CsoSCA is a carbonic anhydrase.	S. Heinhorst, et al., Characterization of the carboxysomal carbonic anhydrase CsoSCA from Halothiobacillus neapolitanus. J. Bacteriol. 188, 8087–8094 (2006).
9	CsoSCA structure.	M. R. Sawaya, et al., The structure of beta-carbonic anhydrase from the carboxysomal shell reveals a distinct subclass with one active site for the price of two. J. Biol. Chem. 281, 7546–7555 (2006).
10	First report of high resolution structures of shell proteins, for the homologous shell proteins of the cyanobacterial β-carboxysome.	C. a. Kerfeld, et al., Protein structures forming the shell of primitive bacterial organelles. Science 309, 936–938 (2005).
11	Review of carboxysome shell protein structures.	J. N. Kinney, S. D. Axen, C. a. Kerfeld, Comparative analysis of carboxysome shell proteins. Photosynth. Res. 109, 21–32 (2011).
12	Csos4A structure.	S. Tanaka, et al., Atomic-level models of the bacterial carboxysome shell. Science 319, 1083–1086 (2008).
13	Csos4AB deletion affects the permeability properties of purified carboxysomes as measured the rate of carbonic anhydrase activity.	F. Cai, et al., The pentameric vertex proteins are necessary for the icosahedral carboxysome shell to function as a CO2 leakage barrier. PLoS One 4, e7521 (2009).
14	Csos4B structure.	Y.-Y. Zhao, Y.-L. Jiang, Y. Chen, C.-Z. Zhou, Q. Li, Crystal structure of pentameric shell protein CsoS4B of Halothiobacillus neapolitanus α-carboxysome. Biochem. Biophys. Res. Commun. (2019) https:/doi.org/10.1016/j.bbrc.2019.05.047.
15	Csos1A structure.	Y. Tsai, et al., Structural analysis of CsoS1A and the protein shell of the Halothiobacillus neapolitanus carboxysome. PLoS Biol. 5, e144 (2007).
16	Reports a bioinformatic analysis and high resolution structure of acRAF. Also gives some evidence that acRAF expression increases rubisco levels.	N. M. Wheatley, C. D. Sundberg, S. D. Gidaniyan, D. Cascio, T. O. Yeates, Structure and identification of a pterin dehydratase-like protein as a ribulose-bisphosphate carboxylase/oxygenase (RuBisCO) assembly factor in the α-carboxysome. J. Biol. Chem. 289, 7973–7981 (2014).
17	Demonstrates that the plant homolog of acRAF, RAF2, is required for the biogenesis of active plant rubisco.	L. Feiz, et al., A protein with an inactive pterin-4a-carbinolamine dehydratase domain is required for Rubisco biogenesis in plants. Plant J. 80, 862–869 (2014).
18	Demonstrates that plant rubisco can be produced hetetologously in E. coli only when 5 chaperones, including RAF2, are co-expressed with rubisco.	H. Aigner, et al., Plant RuBisCo assembly in E. coli with five chloroplast chaperones including BSD2. Science 358, 1272–1278 (2017).
19	Demonstrates a carboxysome positioning defect when a parA homolog (now called mcdB) knocked out in a model beta cyanobacterium, S. elongatus PCC 7942.	D. F. Savage, B. Afonso, A. H. Chen, P. a. Silver, Spatially ordered dynamics of the bacterial carbon fixation machinery. Science 327, 1258–1261 (2010).
20	Genetic dissection of the mechanism of parA/mcdB-based carboxysome positioning relative to the nucleoid. This work	J. S. MacCready, et al., Protein gradients on the nucleoid position the carbon-fixing organelles of cyanobacteria. Elife 7 (2018).
21	First biochemical demonstration that CbbOQ are capable of activating rubisco for catalysis.	Y.-C. C. Tsai, M. C. Lapina, S. Bhushan, O. Mueller-Cajar, Identification and characterization of multiple rubisco activases in chemoautotrophic bacteria. Nat. Commun. 6, 8883 (2015).
22	Structure of H. neapolitanus CbbQ, shown to be an ATPase and localize to the carboxysome.	M. Sutter, et al., Structural Characterization of a Newly Identified Component of α-Carboxysomes: The AAA+ Domain Protein CsoCbbQ. Sci. Rep. 5, 16243 (2015).
23	Structure of CbbQ2, which activates the non-carboxysomal form II rubisco in A. ferrooxidans. Mechanistic biochemical interrogation of the ATPase.	Y.-C. C. Tsai, et al., Insights into the mechanism and regulation of the CbbQO-type Rubisco activase, a MoxR AAA+ ATPase. Proc. Natl. Acad. Sci. U. S. A. (2019) https:/doi.org/10.1073/pnas.1911123117.
24	Early measurement of inorganic carbon uptake by T. crunogena, a gammaproteobacterial chemoautotroph similar to H. neapolitanus.	K. P. Dobrinski, D. L. Longo, K. M. Scott, The carbon-concentrating mechanism of the hydrothermal vent chemolithoautotroph Thiomicrospira crunogena. J. Bacteriol. 187, 5761–5766 (2005).
25	Proteomic analysis implicates DAB genes as inorganic carbon transporters in T. crunogena, confirmed by testing knockout phenotypes. Bioinformatic analysis of the gene family.	M. Mangiapia, et al., Proteomic and mutant analysis of the CO2 concentrating mechanism of hydrothermal vent chemolithoautotroph Thiomicrospira crunogena. J. Bacteriol. (2017) https:/doi.org/10.1128/JB.00871-16.
26	Heterologous expression of diverse DAB-type transport operons in E. coli enables measurable uptake of inorganic carbon.	K. M. Scott, et al., Diversity in CO2-Concentrating Mechanisms among Chemolithoautotrophs from the Genera Hydrogenovibrio, Thiomicrorhabdus, and Thiomicrospira, Ubiquitous in Sulfidic Habitats Worldwide. Appl. Environ. Microbiol. 85, 1–19 (2019).
27	Genome-scale knockout library of H. neapolitanus shows that knockout of DabAB1/2 complexes or acRAF produces an HCR phenotype; DabAB2 are shown to be a zinc-containing membrane-associated complex that functions as an inorganic carbon transporter when expressed heterologously in an E. coli.	J. J. Desmarais, et al., DABs are inorganic carbon pumps found throughout prokaryotic phyla. Nat Microbiol 4, 2204–2215 (2019).
28	Biochemical and structural characterization of bicarbonate binding by the conserved, alpha-carboxysome associated CPII protein. This protein is homologous to P-II nitrogen regulatory proteins.	N. M. Wheatley, et al., A PII-Like Protein Regulated by Bicarbonate: Structural and Biochemical Studies of the Carboxysome-Associated CPII Protein. J. Mol. Biol. 428, 4013–4030 (2016).
29	Csos1D bioinformatic identification.and crystal structure. CsoS1D was found to crystallize in a two-tiered conformation, where each pair contained one open pore and one closed pore, suggesting a "gating" mechanism for controlling leakage through the relatively large pore.	M. G. Klein, et al., Identification and Structural Analysis of a Novel Carboxysome Shell Protein with Implications for Metabolite Transport. J. Mol. Biol. 392, 319–333 (2009).
30	Csos1D found in native carboxysomes.	E. W. Roberts, F. Cai, C. a. Kerfeld, G. C. Cannon, S. Heinhorst, Isolation and characterization of the Prochlorococcus carboxysome reveal the presence of the novel shell protein CsoS1D. J. Bacteriol. 194, 787–795 (2012).
31	Inclusion of Csos1D improves heterologous carboxysome expression.	W. Bonacci, et al., Modularity of a carbon-fixing protein organelle. Proc. Natl. Acad. Sci. U. S. A. 109, 478–483 (2012).
